# Supplementary material for: Effects of prophylactic antibiotic-treatment on post-surgical recovery following intraperitoneal bio-logger implantation in rainbow trout
Source: PubMed Central journal article supplement (PMC7101407; doi:10.1038/s41598-020-62558-y), 2020-03-27
Supplement: 41598_2020_62558_MOESM1_ESM.pdf [file 41598_2020_62558_MOESM1_ESM.pdf]

# **Effects of prophylactic antibiotic-treatment on post-surgical recovery following intraperitoneal bio-logger implantation in rainbow trout**

Per Hjelmstedt<sup>1\*</sup>, Henrik Sundh<sup>2,3</sup>, Jeroen Brijs<sup>1</sup>, Andreas Ekström<sup>2</sup>, Kristina Snuttan Sundell<sup>2,3</sup>, Charlotte Berg<sup>1</sup>, Erik Sandblom<sup>2</sup>, Jennifer Bowman<sup>1</sup>, Daniel Morgenroth<sup>2</sup>, Albin Gräns<sup>1</sup>

<sup>1</sup> Department of Animal Environment and Health, Swedish University of Agricultural Sciences, Skara, SE-532 31, Sweden

<sup>2</sup> Department of Biological and Environmental Sciences, University of Gothenburg, Gothenburg, SE-405-30, Sweden

<sup>3</sup> Swedish Mariculture Research Center, Centre for Sea and Society at University of Gothenburg, SE-405-30, Sweden

\*per.hjelmstedt@slu.se

| <b>Protein</b>                 | <b>Primer name</b>    | <b>Primer sequence (5'-3')</b> | <b>Amplicon size (bp)</b> | <b>Accession number</b> | <b>Efficiency (%)</b> |
|--------------------------------|-----------------------|--------------------------------|---------------------------|-------------------------|-----------------------|
| <b>TNF<math>\alpha</math></b>  | TNF $\alpha$<br>FwOm  | CAAGAGTTTGAACCTCATTTCAG        | 208                       | AJ277604                | 102.7                 |
|                                | TNF $\alpha$<br>ReOm  | GCTGCTGCCGCACATAAAG            |                           |                         |                       |
| <b>TGF<math>\beta</math></b>   | TGF $\beta$<br>FwOm   | AGATAAATCGGAGAGTTGCTGTG        | 275                       | X99303                  | 104.7                 |
|                                | TGF $\beta$<br>ReOm   | CCTGCTCCACCTTGTGTTGT           |                           |                         |                       |
| <b>ELF1<math>\alpha</math></b> | ELF1 $\alpha$<br>FwOm | CAAGGATATCCGTCGTGGCA           | 327                       | AF498320                | 103.2                 |
|                                | ELF1 $\alpha$<br>ReOm | ACAGCGAAACGACCAAGAGG           |                           |                         |                       |

*Supplementary Table S1. Primer sequences, size, primer efficiency and accession numbers for TNF $\alpha$  (pro inflammatory), TGF $\beta$  (anti inflammatory) and ELF1 $\alpha$  (reference gene).*
